# Supplementary material for: Identification and Expression Analysis of MATE Genes Involved in Flavonoid Transport in Blueberry Plants
Source: PLoS One. 2015 Mar 17;10(3):e0118578. doi: 10.1371/journal.pone.0118578 (PMC4363705; doi:10.1371/journal.pone.0118578)
Supplement: S2 Table — (XLS) [file pone.0118578.s002.xls]

## Sheet: Sheet1
	Primer sequence	use
VcMATE1-Sp1	GAATTAAGAAGCGGGCGTA	Amplify 5′ end of VcMATE1 by genome walking
VcMATE1-Sp2	AGGACTGCCCACAGAATGT
VcMATE1-Sp3	CCCAAGATGACCCACAAA
VcMATE2-Sp1	GCTCCCACCATAGCAATAGATG	Amplify 5′ end of VcMATE2 by genome walking
VcMATE2-Sp2	TTCTCGGCTATGTCTTCTGCTT
VcMATE2-Sp3	GAGGGTTCACGATGTTCTGTGCTT
VcMATE5-Sp1	AGCAAGATCGGCAATCTCGTCT	Amplify 5′ end of VcMATE5 by genome walking
VcMATE5-Sp2	TGTCCGCAAAGAGTCTCCAGT
VcMATE5-Sp3	GAAACGGCGGAAAGCTCAATAT
VcMATE8-Sp1	TGAAGAACACCAAGCCAAG	Amplify 5′ end of VcMATE8 by RACE
VcMATE8-Sp2	GCACAACATAAACTCCCAAG
VcMATE9-Sp1	CTCCAGGCACAGCATAACC	Amplify 5′ end of VcMATE9 by RACE
VcMATE9-Sp2	ATCCACCACGACAGGCTCA
VcMATE9-Sp3	TGGCGTATGTGAATGTGGG	Amplify 3′ end of VcMATE9 by RACE
VcMATE9-Sp4	TGTTCTTGGCTTTAAGTTCG
